# Supplementary material for: Novel Eu3+-activated Ba2Y5B5O17 red-emitting phosphors for white LEDs: high color purity, high quantum efficiency and excellent thermal stability
Source: Royal Society of Chemistry journal article supplement (doi:10.1039/c8ra03059f), 2018-01-01
Supplement: c8ra03059f1.pdf [file c8ra03059f1.pdf]

## **Supporting Information**

# **Novel Eu<sup>3+</sup>-activated Ba<sub>2</sub>Y<sub>5</sub>B<sub>5</sub>O<sub>17</sub> red-emitting phosphors for white LEDs: High color purity, high quantum efficiency and excellent thermal stability**

G. Annadurai,<sup>a</sup> Balaji Devakumar,<sup>a</sup> Heng Guo,<sup>a,b</sup> R. Vijayakumar,<sup>a</sup> Bin Li,<sup>a</sup> Liangling Sun,<sup>a</sup>  
Xiaoyong Huang,<sup>a,b,\*</sup> Kai Wang,<sup>b,\*</sup> and Xiao Wei Sun<sup>b,\*</sup>

<sup>a</sup>Key Lab of Advanced Transducers and Intelligent Control System, Ministry of Education and Shanxi Province, College of Physics and Optoelectronics, Taiyuan University of Technology, Taiyuan 030024, P. R. China

<sup>b</sup>Department of Electrical and Electronic Engineering, Southern University of Science and Technology, Shenzhen 518055, P.R. China

\*Corresponding authors, E-mail addresses: [huangxy04@126.com](mailto:huangxy04@126.com) (X. Huang); [wangk@sustc.edu.cn](mailto:wangk@sustc.edu.cn) (K. Wang); [sunxw@sustc.edu.cn](mailto:sunxw@sustc.edu.cn) (X. W. Sun)

**Table S1:**

The atomic coordinations, occupancies and isotropic displacement parameters as determined by Rietveld refinement for  $\text{Ba}_2\text{Y}_5\text{B}_5\text{O}_{17}$

| Atom | x       | y       | z       | occ.    | $U_{\text{iso}}(\text{\AA}^2)$ | Wyck. |
|------|---------|---------|---------|---------|--------------------------------|-------|
| Ba1  | 0.33581 | 0.02396 | 0.18393 | 0.90943 | -0.0062                        | 8d    |
| Y1   | 0.33581 | 0.02396 | 0.18393 | 0.90943 | -0.0062                        | 8d    |
| Ba2  | 0.5     | 0.41124 | 0.75    | 0.18114 | 0.0024                         | 4c    |
| Y2   | 0.5     | 0.41124 | 0.75    | 0.18114 | 0.0024                         | 4c    |
| Y3   | 0.18134 | 0.04687 | 0.41484 | 1       | -0.00589                       | 8d    |
| Y4   | 0.01594 | 0.76072 | 0.47898 | 1       | 0.01409                        | 8d    |
| B1   | 0.15432 | 0.51804 | 0.40532 | 1       | -0.09                          | 8d    |
| O1   | 0.19449 | 0.37813 | 0.4037  | 1       | -0.06707                       | 8d    |
| O2   | 0.15118 | 0.70069 | 0.39997 | 1       | -0.01794                       | 8d    |
| O3   | 0.08387 | 0.45757 | 0.49893 | 1       | 0.0003                         | 8d    |
| B2   | 0.65421 | 0.5521  | 0.76958 | 1       | 0.0596                         | 8d    |
| O4   | 0.68239 | 0.41402 | 0.75251 | 1       | 0.0293                         | 8d    |
| O5   | 0.61361 | 0.35693 | 0.88268 | 1       | 0.01608                        | 8d    |
| O6   | 0.6953  | 0.57904 | 0.91649 | 1       | 0.03028                        | 8d    |
| O7   | 0.94272 | 0.93885 | 0.57988 | 1       | -0.02678                       | 8d    |
| O8   | 0.0302  | 0.25278 | 0.67564 | 1       | -0.00313                       | 8d    |
| O9   | 0.5     | 0.95211 | 0.25    | 1       | -0.02375                       | 4c    |
| B3   | 0.0     | 0.63778 | 0.25    | 1       | -0.08043                       | 4c    |

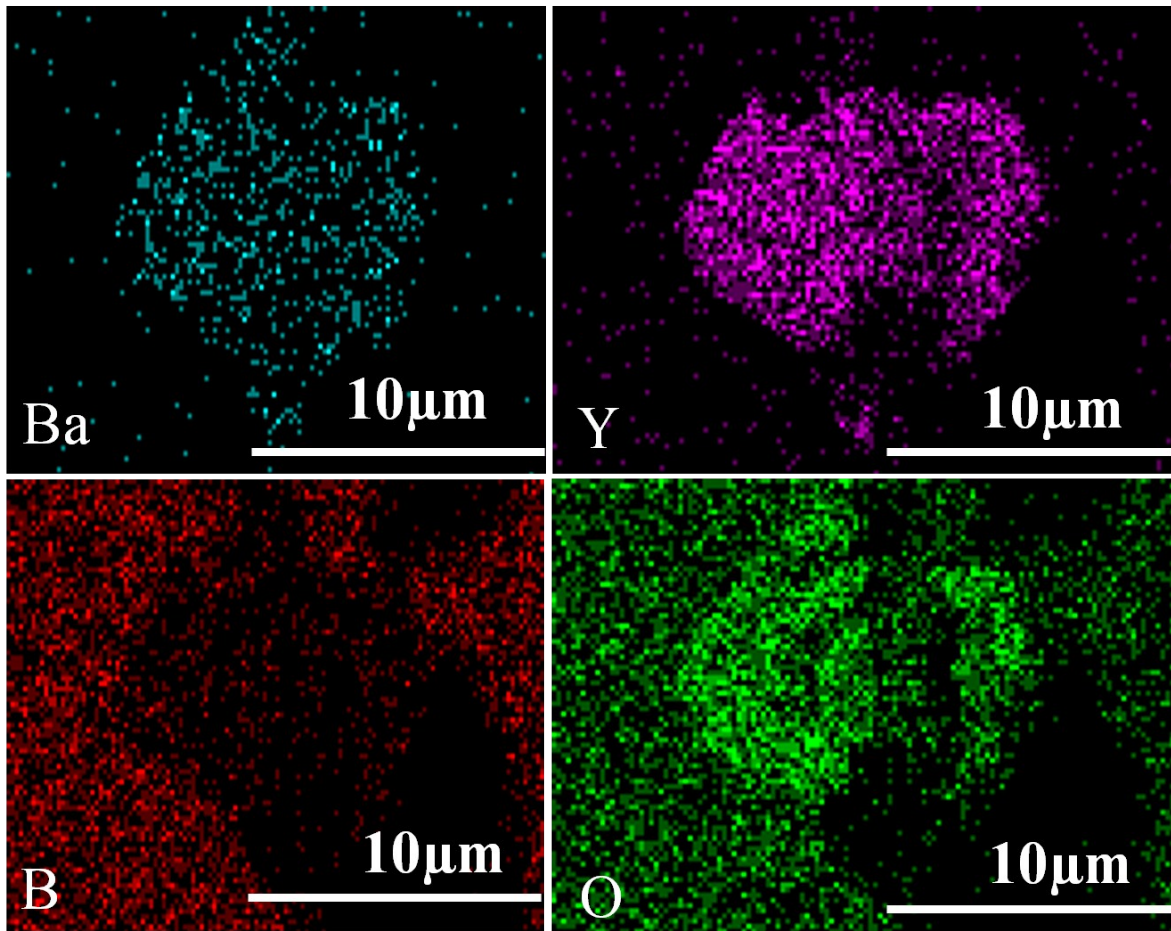

**Fig. S1** : The elemental mapping of Ba/Y/B/O for the  $\text{Ba}_2\text{Y}_{4.2}\text{Eu}_{0.8}\text{B}_5\text{O}_{17}$  phosphors
